# Supplementary figures and images for: Lack of Endothelial α1AMPK Reverses the Vascular Protective Effects of Exercise by Causing eNOS Uncoupling
Source: MDPI journal article supplement (doi:10.3390/antiox10121974), 2021-12-10

## Supplemental Figure S1

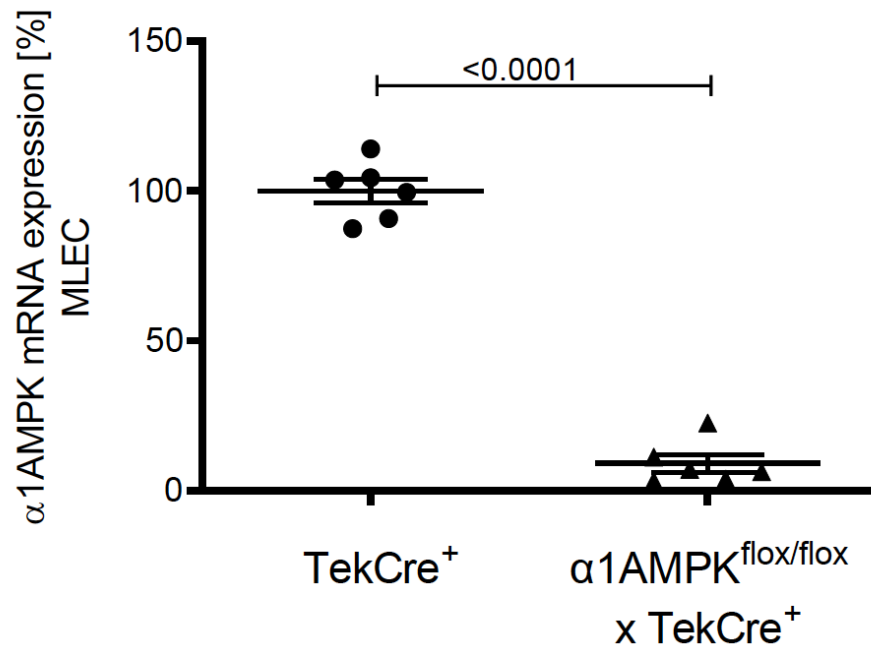

Figure S1. mRNA expression of  $\alpha 1$ AMPK in MLEC.

Supplement: s1 [file s1]
